# Supplementary material for: Corrosion inhibition of N80 steel in 15% HCl by pyrazolone derivatives: electrochemical, surface and quantum chemical studies
Source: Royal Society of Chemistry journal article supplement (doi:10.1039/c5ra25441h), 2016-01-01
Supplement: c5ra25441h1.pdf [file c5ra25441h1.pdf]

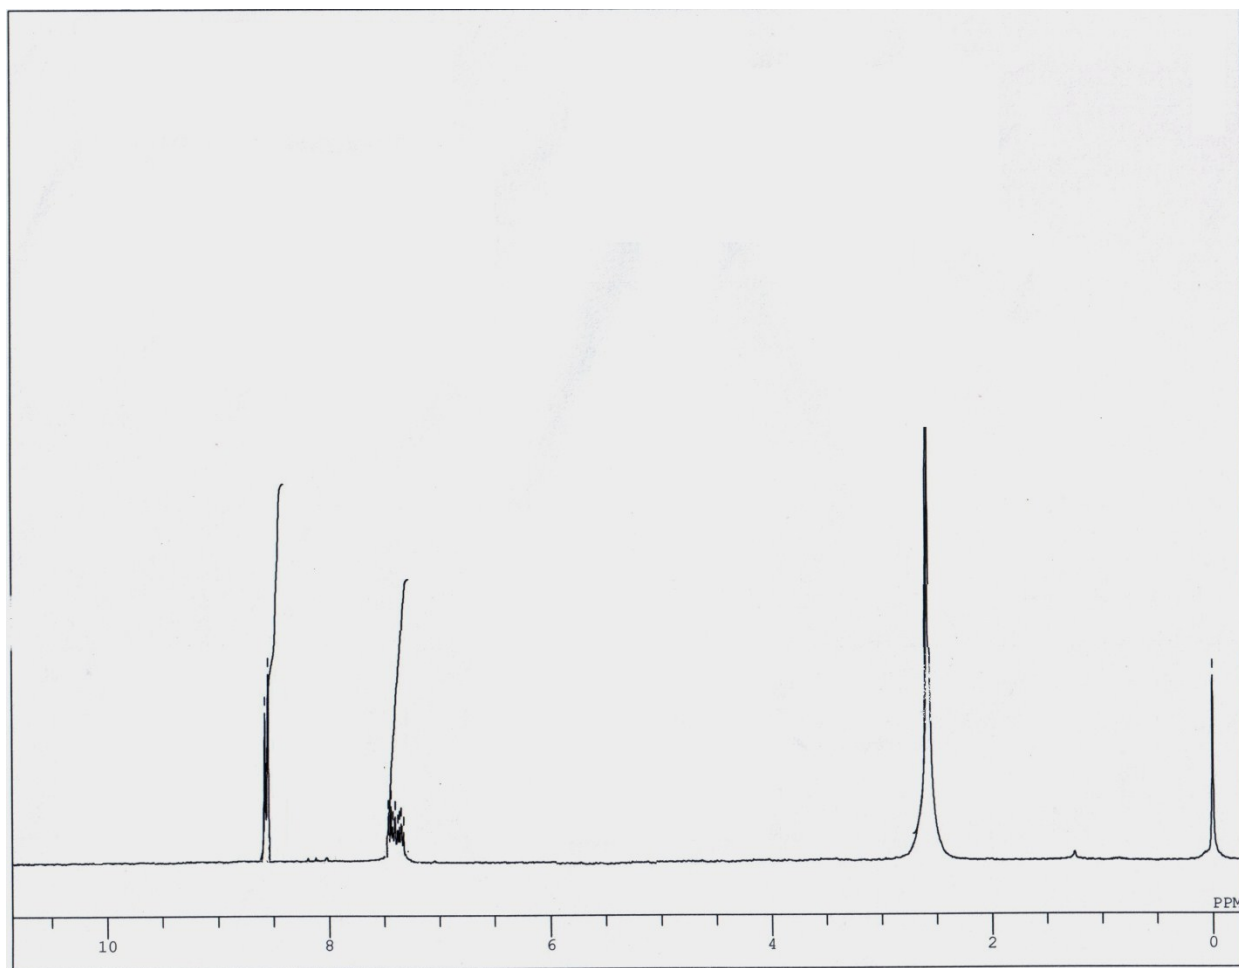

**<sup>1</sup>H-NMR: 2-(3-amino-5-oxo-4,5-dihydro-1H-pyrazol-1-yl)(phenyl)methylmalononitrile (PZ-2)**

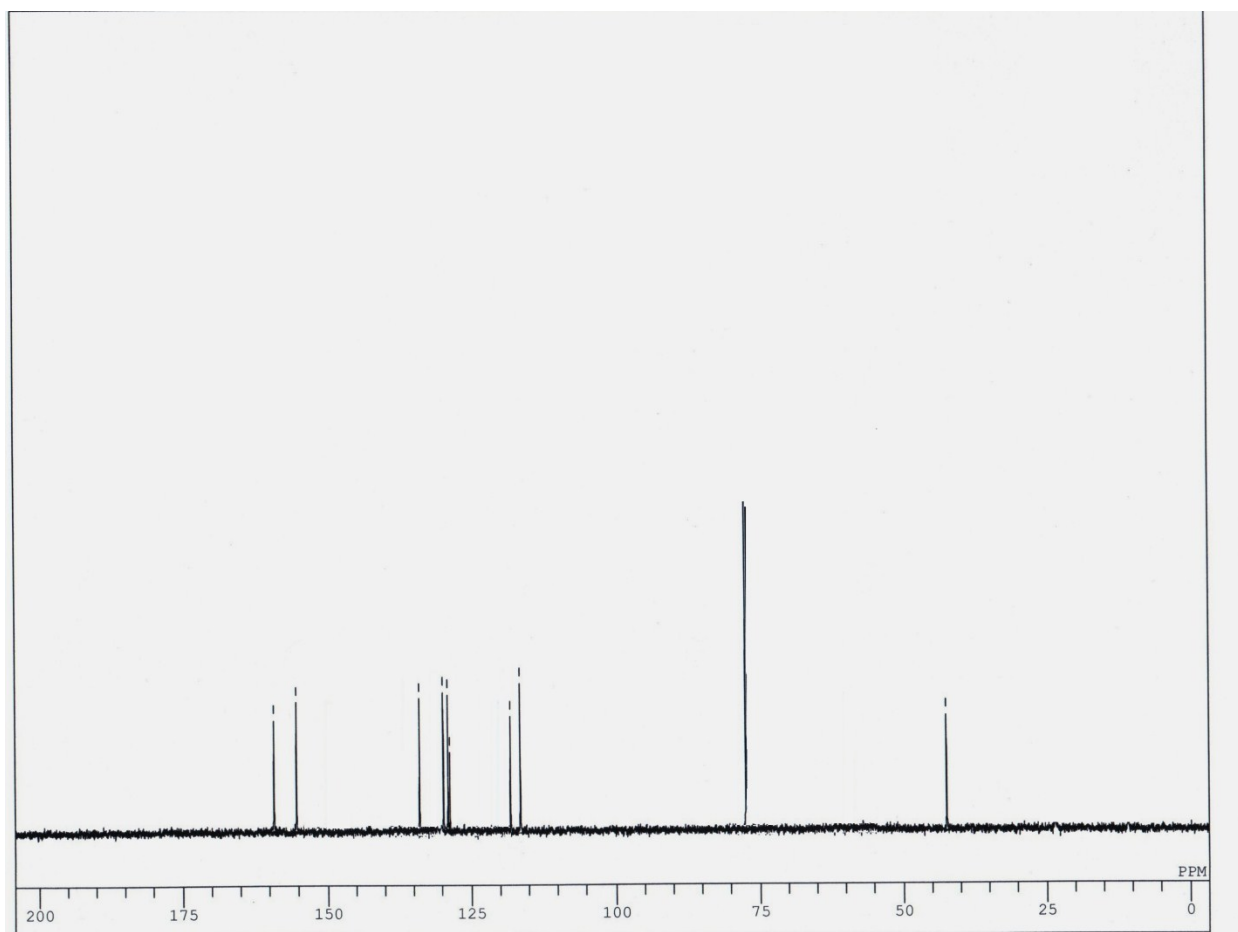

**$^{13}\text{C}$ -NMR: 2-(3-amino-5-oxo-4,5-dihydro-1H-pyrazol-1-yl)(phenyl)methylmalononitrile (PZ-2)**

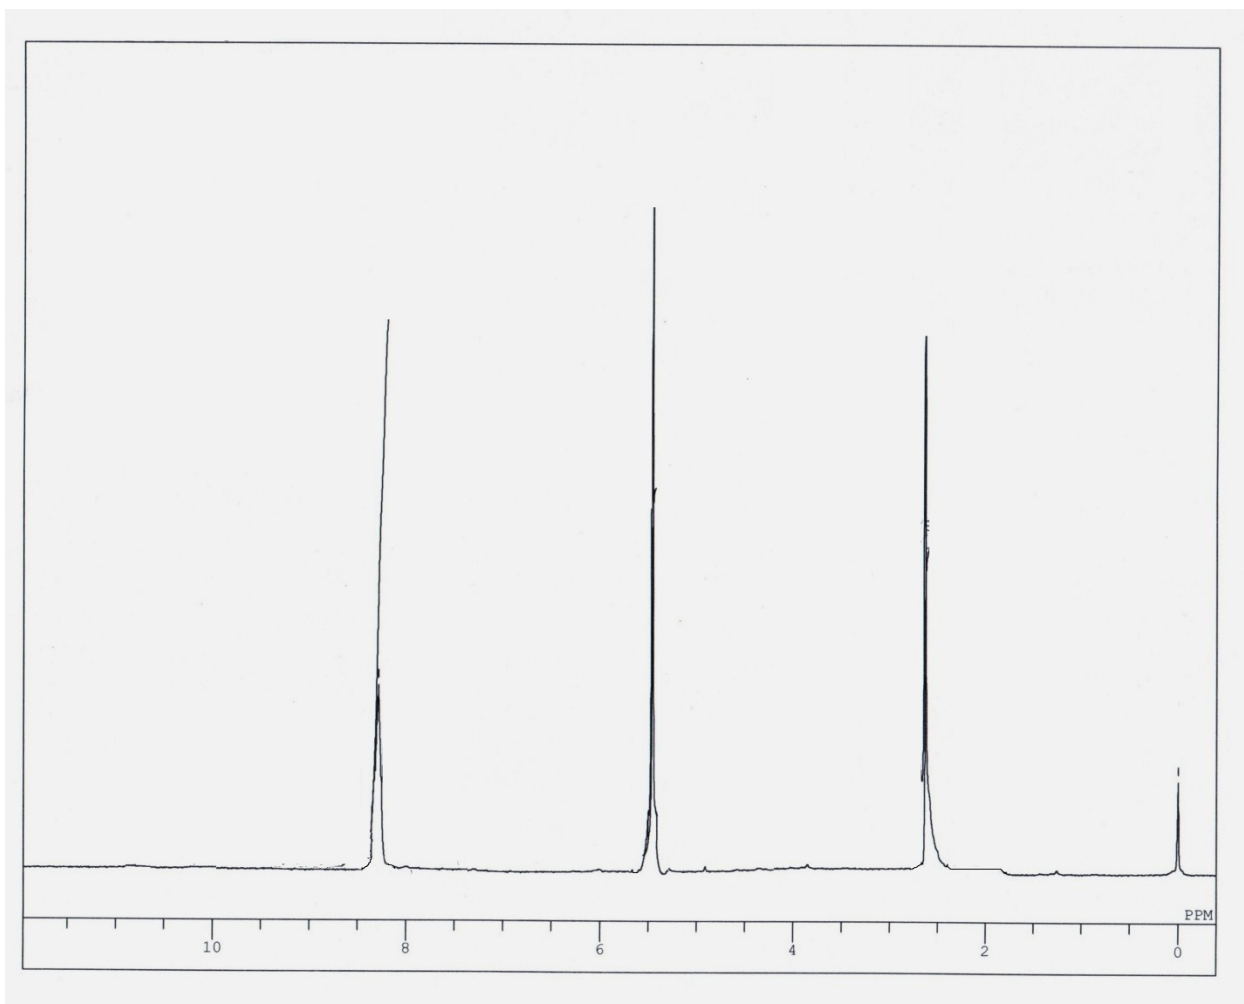

**<sup>1</sup>H-NMR: 2-(3-amino-5-oxo-4,5-dihydro-1H-pyrazol-1-yl)(p-tolyl)methyl malononitrile (PZ-1)**

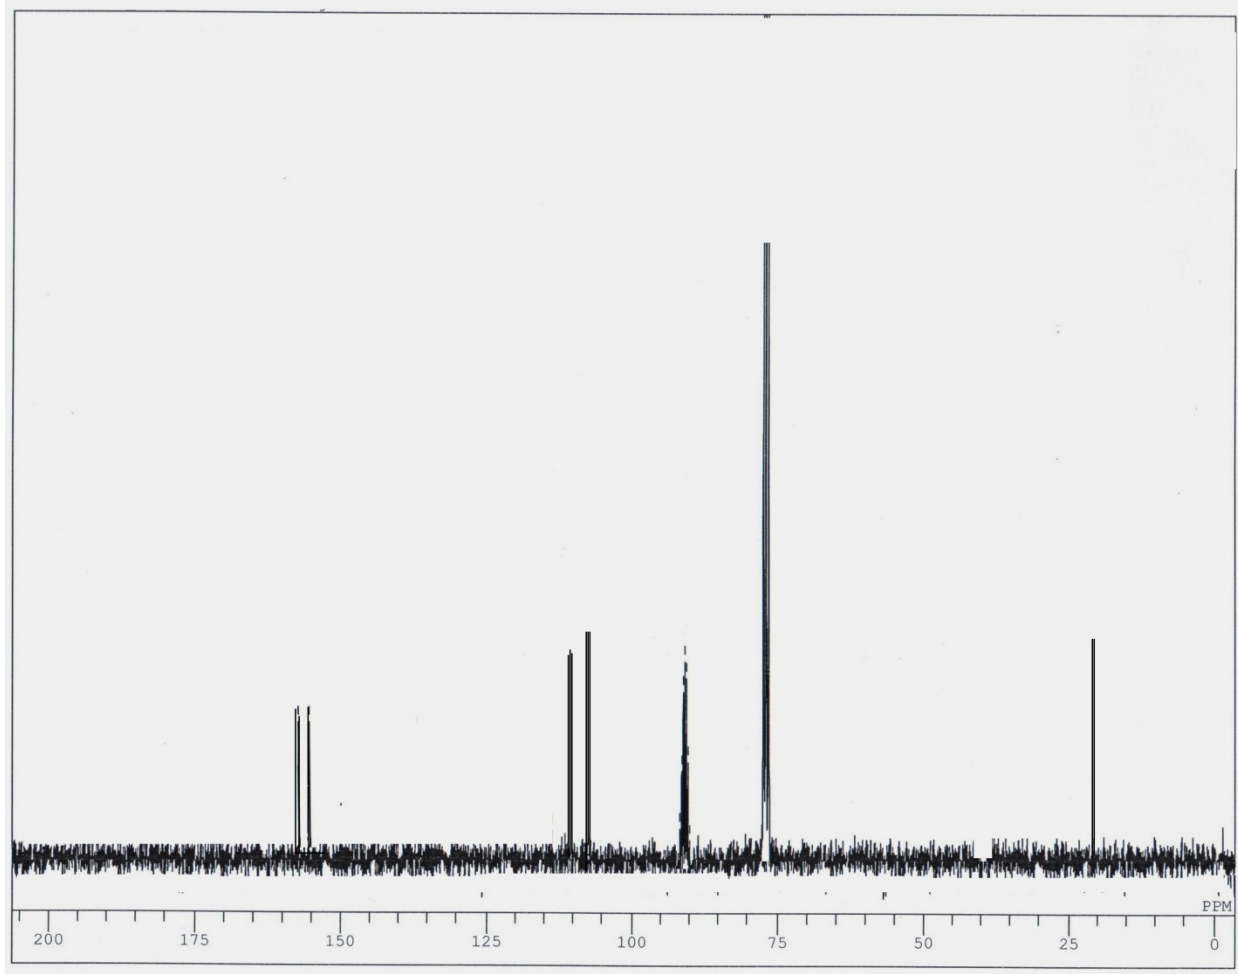

**<sup>13</sup>C: 2-(3-amino-5-oxo-4,5-dihydro-1H-pyrazol-1-yl)(p-tolyl)methyl malononitrile (PZ-1)**
